# Supplementary material
Source: publisher site journal article supplement (https://www.spandidos-publications.com/8459/downloadSupplementary)

Figure S1. Representative HPLC chromatogram of GLD. The analysis was performed at a detection wavelength of 232 nm. The major peak corresponding to GLD appeared at a retention time of 26.347 min with a peak area of 98.84%, indicating a purity of >98%. No internal standard was used. GLD, glaucocalyxin D.

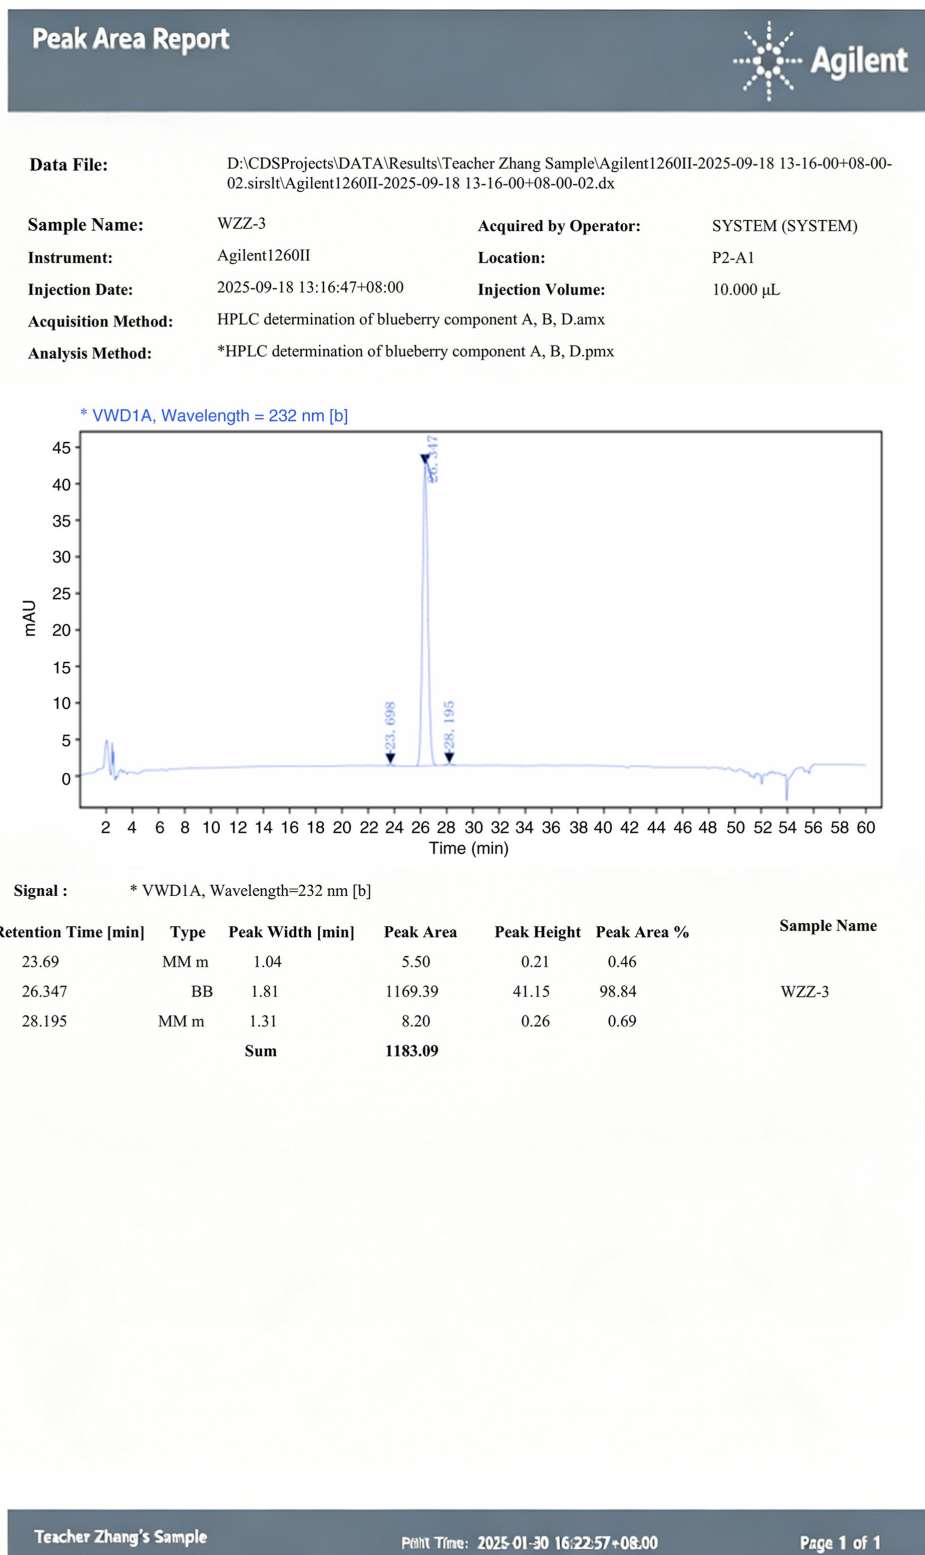

Figure S2. Representative  $^1\text{H}$  NMR spectrum of GLD. The spectrum was recorded in deuterated solvent ( $\text{CDCl}_3$ ) with tetramethylsilane as the internal standard. Chemical shifts ( $\delta$ ) are reported in parts per million. GLD, glaucocalyxin D. The Y-axis intensity is displayed as generated by the instrument (values  $\times 10^{-12}$ ).

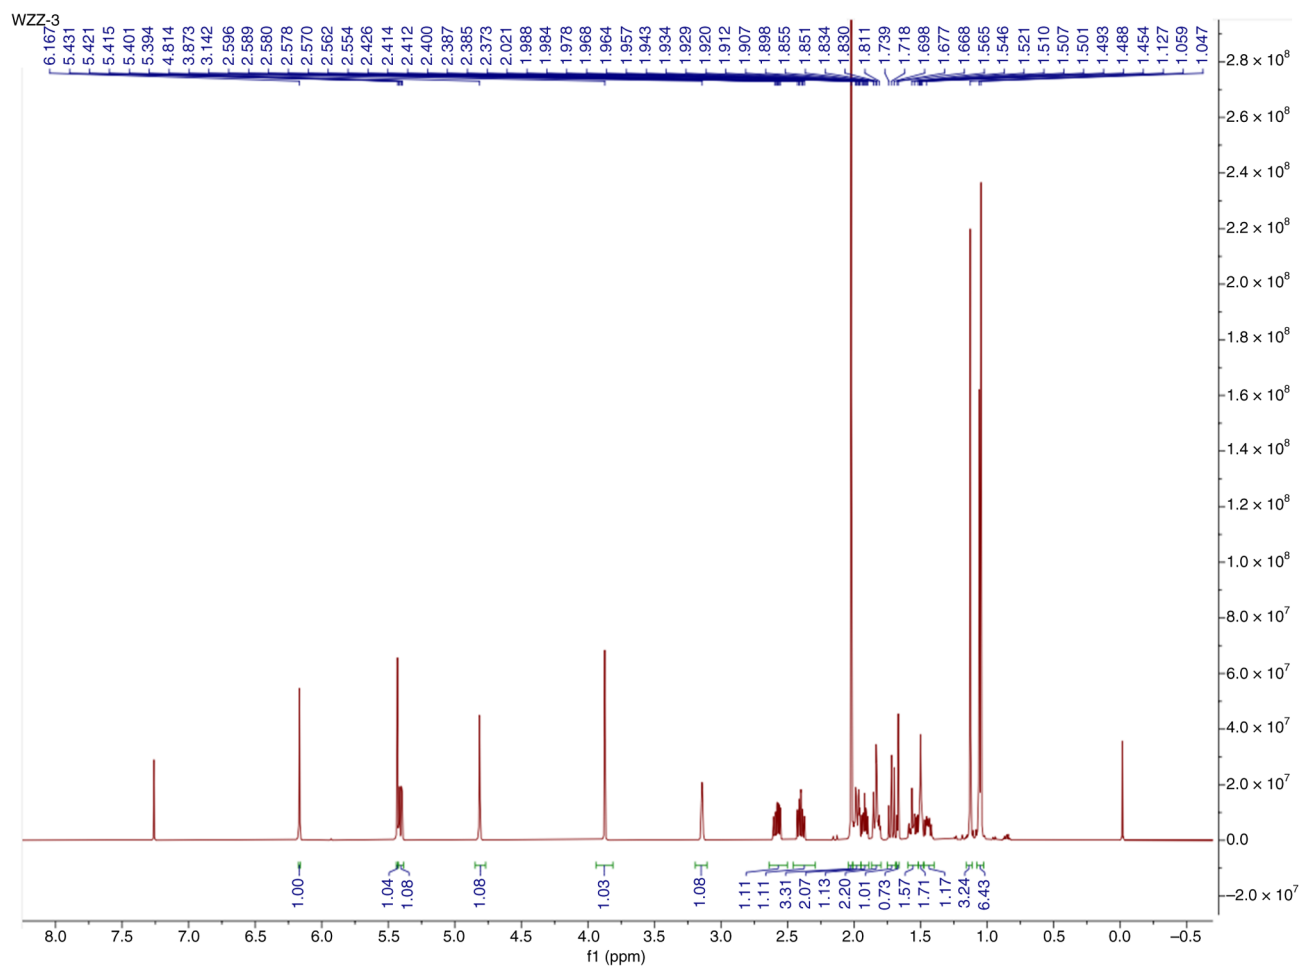

Figure S3. Representative  $^{13}\text{C}$  NMR spectrum of GLD. The spectrum was recorded in deuterated solvent ( $\text{CDCl}_3$ ) with tetramethylsilane as the internal standard. Chemical shifts ( $\delta$ ) are reported in parts per million. GLD, glaucocalyxin D.

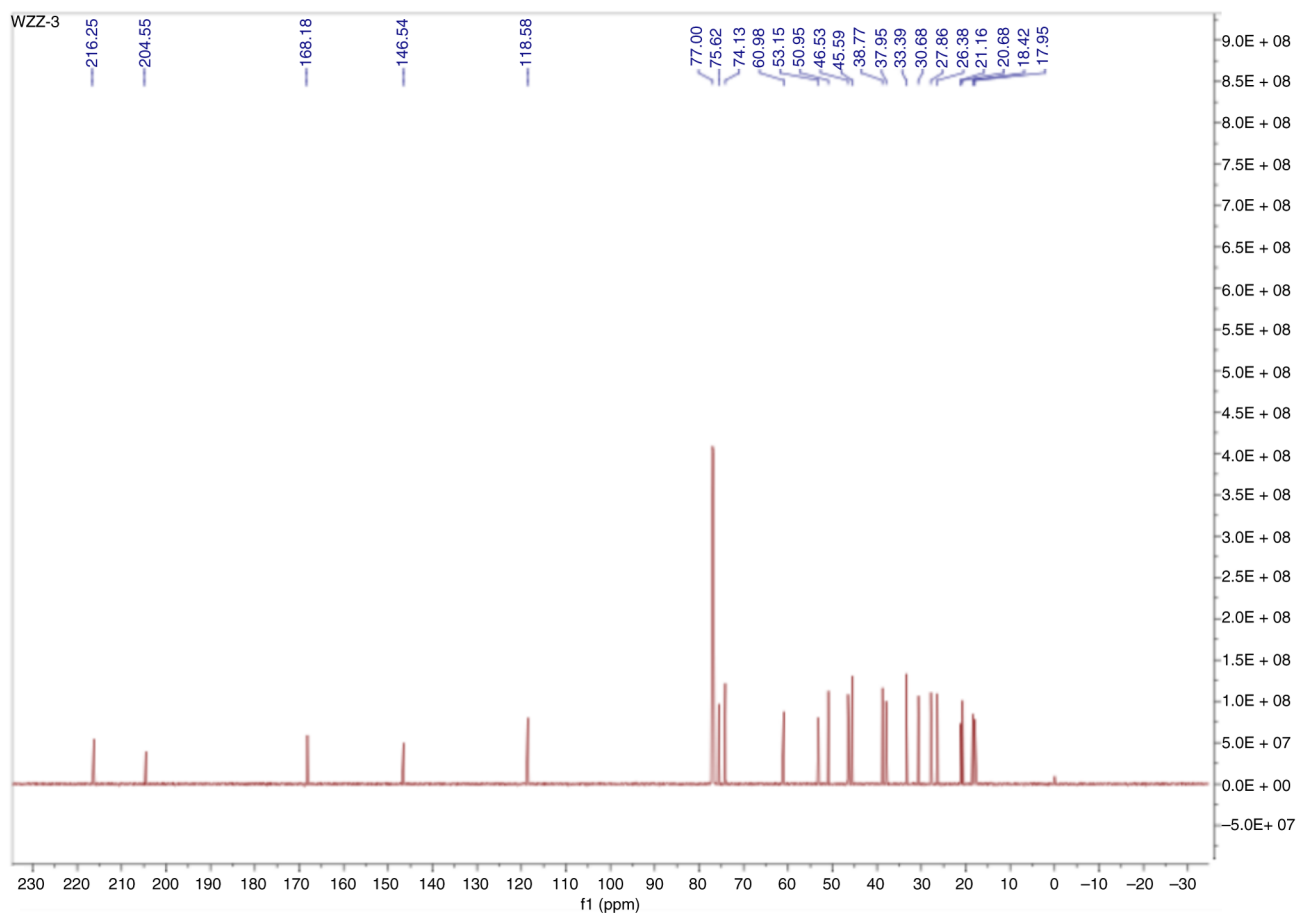

Supplement: Supplementary file 1 [file downloadSupplementary]
